# Supplementary material
Source: HighWire-hosted journal article supplement (https://bjsm.bmj.com/content/bjsports-2022-106299)
Supplement: inline-supplementary-material-3 [file inline-supplementary-material-3.pdf]

**SUPPLEMENTARY FILE 2: Consensus Experts, Primary Affiliation, Role and Involvement**

| Name                | Primary Affiliation                                         | Role                                    | Convene Steering Committee | Develop Guiding Questions | Convene Expert Group | Evidence Synthesis | Generate Consensus Recommendations | Revise Recommendations | Rate Recommendations |
|---------------------|-------------------------------------------------------------|-----------------------------------------|----------------------------|---------------------------|----------------------|--------------------|------------------------------------|------------------------|----------------------|
| Jackie Whittaker    | University of British Columbia, Canada                      | steering committee review lead author   | ✓                          | ✓                         | ✓                    | ✓                  | ✓                                  | ✓                      | ✓                    |
| Adam G. Culvenor    | La Trobe University, Australia                              | steering committee review lead author   | ✓                          | ✓                         | ✓                    | ✓                  | ✓                                  | ✓                      | ✓                    |
| Carsten Juhl*       | University of Southern Denmark, Denmark                     | steering committee review co-author     | ✓                          | -                         | -                    | ✓                  | -                                  | -                      | -                    |
| Kay M. Crossley     | La Trobe University, Australia                              | steering committee review senior author | ✓                          | ✓                         | ✓                    | ✓                  | ✓                                  | ✓                      | ✓                    |
| Ewa M. Roos         | University of Southern Denmark, Denmark                     | steering committee review senior author | ✓                          | ✓                         | ✓                    | ✓                  | ✓                                  | ✓                      | ✓                    |
| Clare Ardern        | University of British Columbia, Canada                      | meeting facilitator                     | -                          | -                         | -                    | -                  | -                                  | -                      | ✓                    |
| Maxi Miciak         | University of Alberta, Canada                               | patient partner                         | -                          | -                         | -                    | ✓                  | ✓                                  | ✓                      | -                    |
| Mick Hughes         | North Queensland Physiotherapy Centre, Townsville Australia | clinician partner                       | -                          | -                         | -                    | ✓                  | ✓                                  | ✓                      | -                    |
| Bjørnar Berg        | Oslo University Hospital, Norway                            | review lead author                      | -                          | -                         | -                    | ✓                  | ✓                                  | ✓                      | ✓                    |
| Carolyn A. Emery    | University of Calgary, Canada                               | review senior author                    | -                          | -                         | -                    | ✓                  | ✓                                  | ✓                      | ✓                    |
| Stephanie R. Filbay | University of Melbourne, Australia                          | review lead author                      | -                          | -                         | -                    | ✓                  | ✓                                  | ✓                      | ✓                    |
| Pætur M. Holm       | University of Southern Denmark, Denmark                     | review lead author                      | -                          | -                         | -                    | ✓                  | ✓                                  | ✓                      | ✓                    |
| Erin M. Macri       | Erasmus University Medical Center, Netherlands              | review lead author                      | -                          | -                         | -                    | ✓                  | ✓                                  | ✓                      | ✓                    |
| May Arna Risberg    | University of Oslo, Norway                                  | review senior author                    | -                          | -                         | -                    | ✓                  | ✓                                  | ✓                      | ✓                    |

|                         |                                                  |                                    |   |   |   |   |   |   |   |
|-------------------------|--------------------------------------------------|------------------------------------|---|---|---|---|---|---|---|
| Anouk P. Urhausen       | Norwegian School of Sport Sciences, Norway       | review lead author                 | - | - | - | ✓ | ✓ | ✓ | ✓ |
| Marienke van Middlekoop | Erasmus University Medical Center, Netherlands   | review senior author               | - | - | - | ✓ | ✓ | ✓ | ✓ |
| Alessio Bricca          | University of Southern Denmark, Denmark          | review senior author               | - | - | - | ✓ | ✓ | ✓ | ✓ |
| Andrea M. Bruder        | La Trobe University, Australia                   | consensus group member             | - | - | - | - | - | ✓ | ✓ |
| Garrett Bullock         | Wake Forest School of Medicine, USA              | review co-author                   | - | - | - | ✓ | ✓ | ✓ | ✓ |
| Allison M. Ezzat        | La Trobe University, Australia                   | review co-author                   | - | - | - | ✓ | ✓ | ✓ | ✓ |
| Michael A. Girdwood     | La Trobe University, Australia                   | review co-author                   | - | - | - | ✓ | ✓ | ✓ | ✓ |
| Mellissa J. Haberfield  | La Trobe University, Australia                   | review co-author                   | - | - | - | ✓ | ✓ | ✓ | ✓ |
| Mick Hughes             | North Queensland Physiotherapy Centre, Australia | clinician partner                  | - | - | - | ✓ | - | - | - |
| Lina H. Ingelsrud       | Copenhagen University Hospital, Denmark          | review co-author                   | - | - | - | ✓ | ✓ | ✓ | ✓ |
| Karim Kahn              | University of British Columbia, Canada           | review co-author                   | - | - | - | ✓ | ✓ | ✓ | ✓ |
| Staffan Larsson         | Lund University, Sweden                          | review co-author                   | - | - | - | ✓ | ✓ | - | - |
| Christina Y. Le         | University of Alberta, Canada                    | review co-author                   | - | - | - | ✓ | ✓ | ✓ | ✓ |
| L. Stefan Lohmander     | Lund University, Sweden                          | review co-author                   | - | - | - | ✓ | ✓ | ✓ | ✓ |
| Justin M. Losciale      | University of British Columbia, Canada           | review co-author                   | - | - | - | ✓ | ✓ | ✓ | ✓ |
| Matilde Lundberg        | University of Southern Denmark, Denmark          | review co-author                   | - | - | - | ✓ | ✓ | ✓ | ✓ |
| Maxi Miciak             | University of Alberta, Canada                    | review co-author / patient partner | - | - | - | ✓ | ✓ | - | - |
| Britt E. Øiestad        | Oslo Metropolitan University, Norway             | review co-author                   | - | - | - | ✓ | ✓ | ✓ | ✓ |

|                   |                                                  |                              |   |   |   |   |   |   |   |
|-------------------|--------------------------------------------------|------------------------------|---|---|---|---|---|---|---|
| Brooke Patterson  | La Trobe University, Australia                   | review co-author             | - | - | - | ✓ | ✓ | ✓ | ✓ |
| Anu M. Raisanen   | Western University of Health Sciences, USA       | review co-author             | - | - | - | ✓ | ✓ | ✓ | ✓ |
| Søren Skou        | University of Southern Denmark, Denmark          | review co-author             | - | - | - | ✓ | ✓ | ✓ | ✓ |
| André Struglics   | Lund University, Sweden                          | review co-author             | - | - | - | ✓ | ✓ | - | - |
| Berend Terluin    | Amsterdam University Medical Centre, Netherlands | review co-author             | - | - | - | ✓ | ✓ | - | - |
| Jonas B. Thorlund | University of Southern Denmark, Denmark          | review co-author             | - | - | - | ✓ | ✓ | ✓ | ✓ |
| Clodagh M. Toomey | University of Limerick, Ireland                  | review co-author             | - | - | - | ✓ | ✓ | ✓ | ✓ |
| Linda K. Truong   | University of British Columbia, Canada           | review co-author             | - | - | - | ✓ | ✓ | ✓ | ✓ |
| Belle L van Meer  | Erasmus University Medical Center, Netherlands   | review co-author / clinician | - | - | - | ✓ | ✓ | ✓ | ✓ |
| Thomas J. West    | La Trobe University, Australia                   | review co-author             | - | - | - | ✓ | ✓ | ✓ | ✓ |
| James J. Young    | University of Southern Denmark, Denmark          | review co-author             | - | - | - | ✓ | ✓ | ✓ | ✓ |

\*Steering committee member with expertise in evidence synthesis
